# Supplementary material
Source: PubMed Central journal article supplement (PMC7093852)

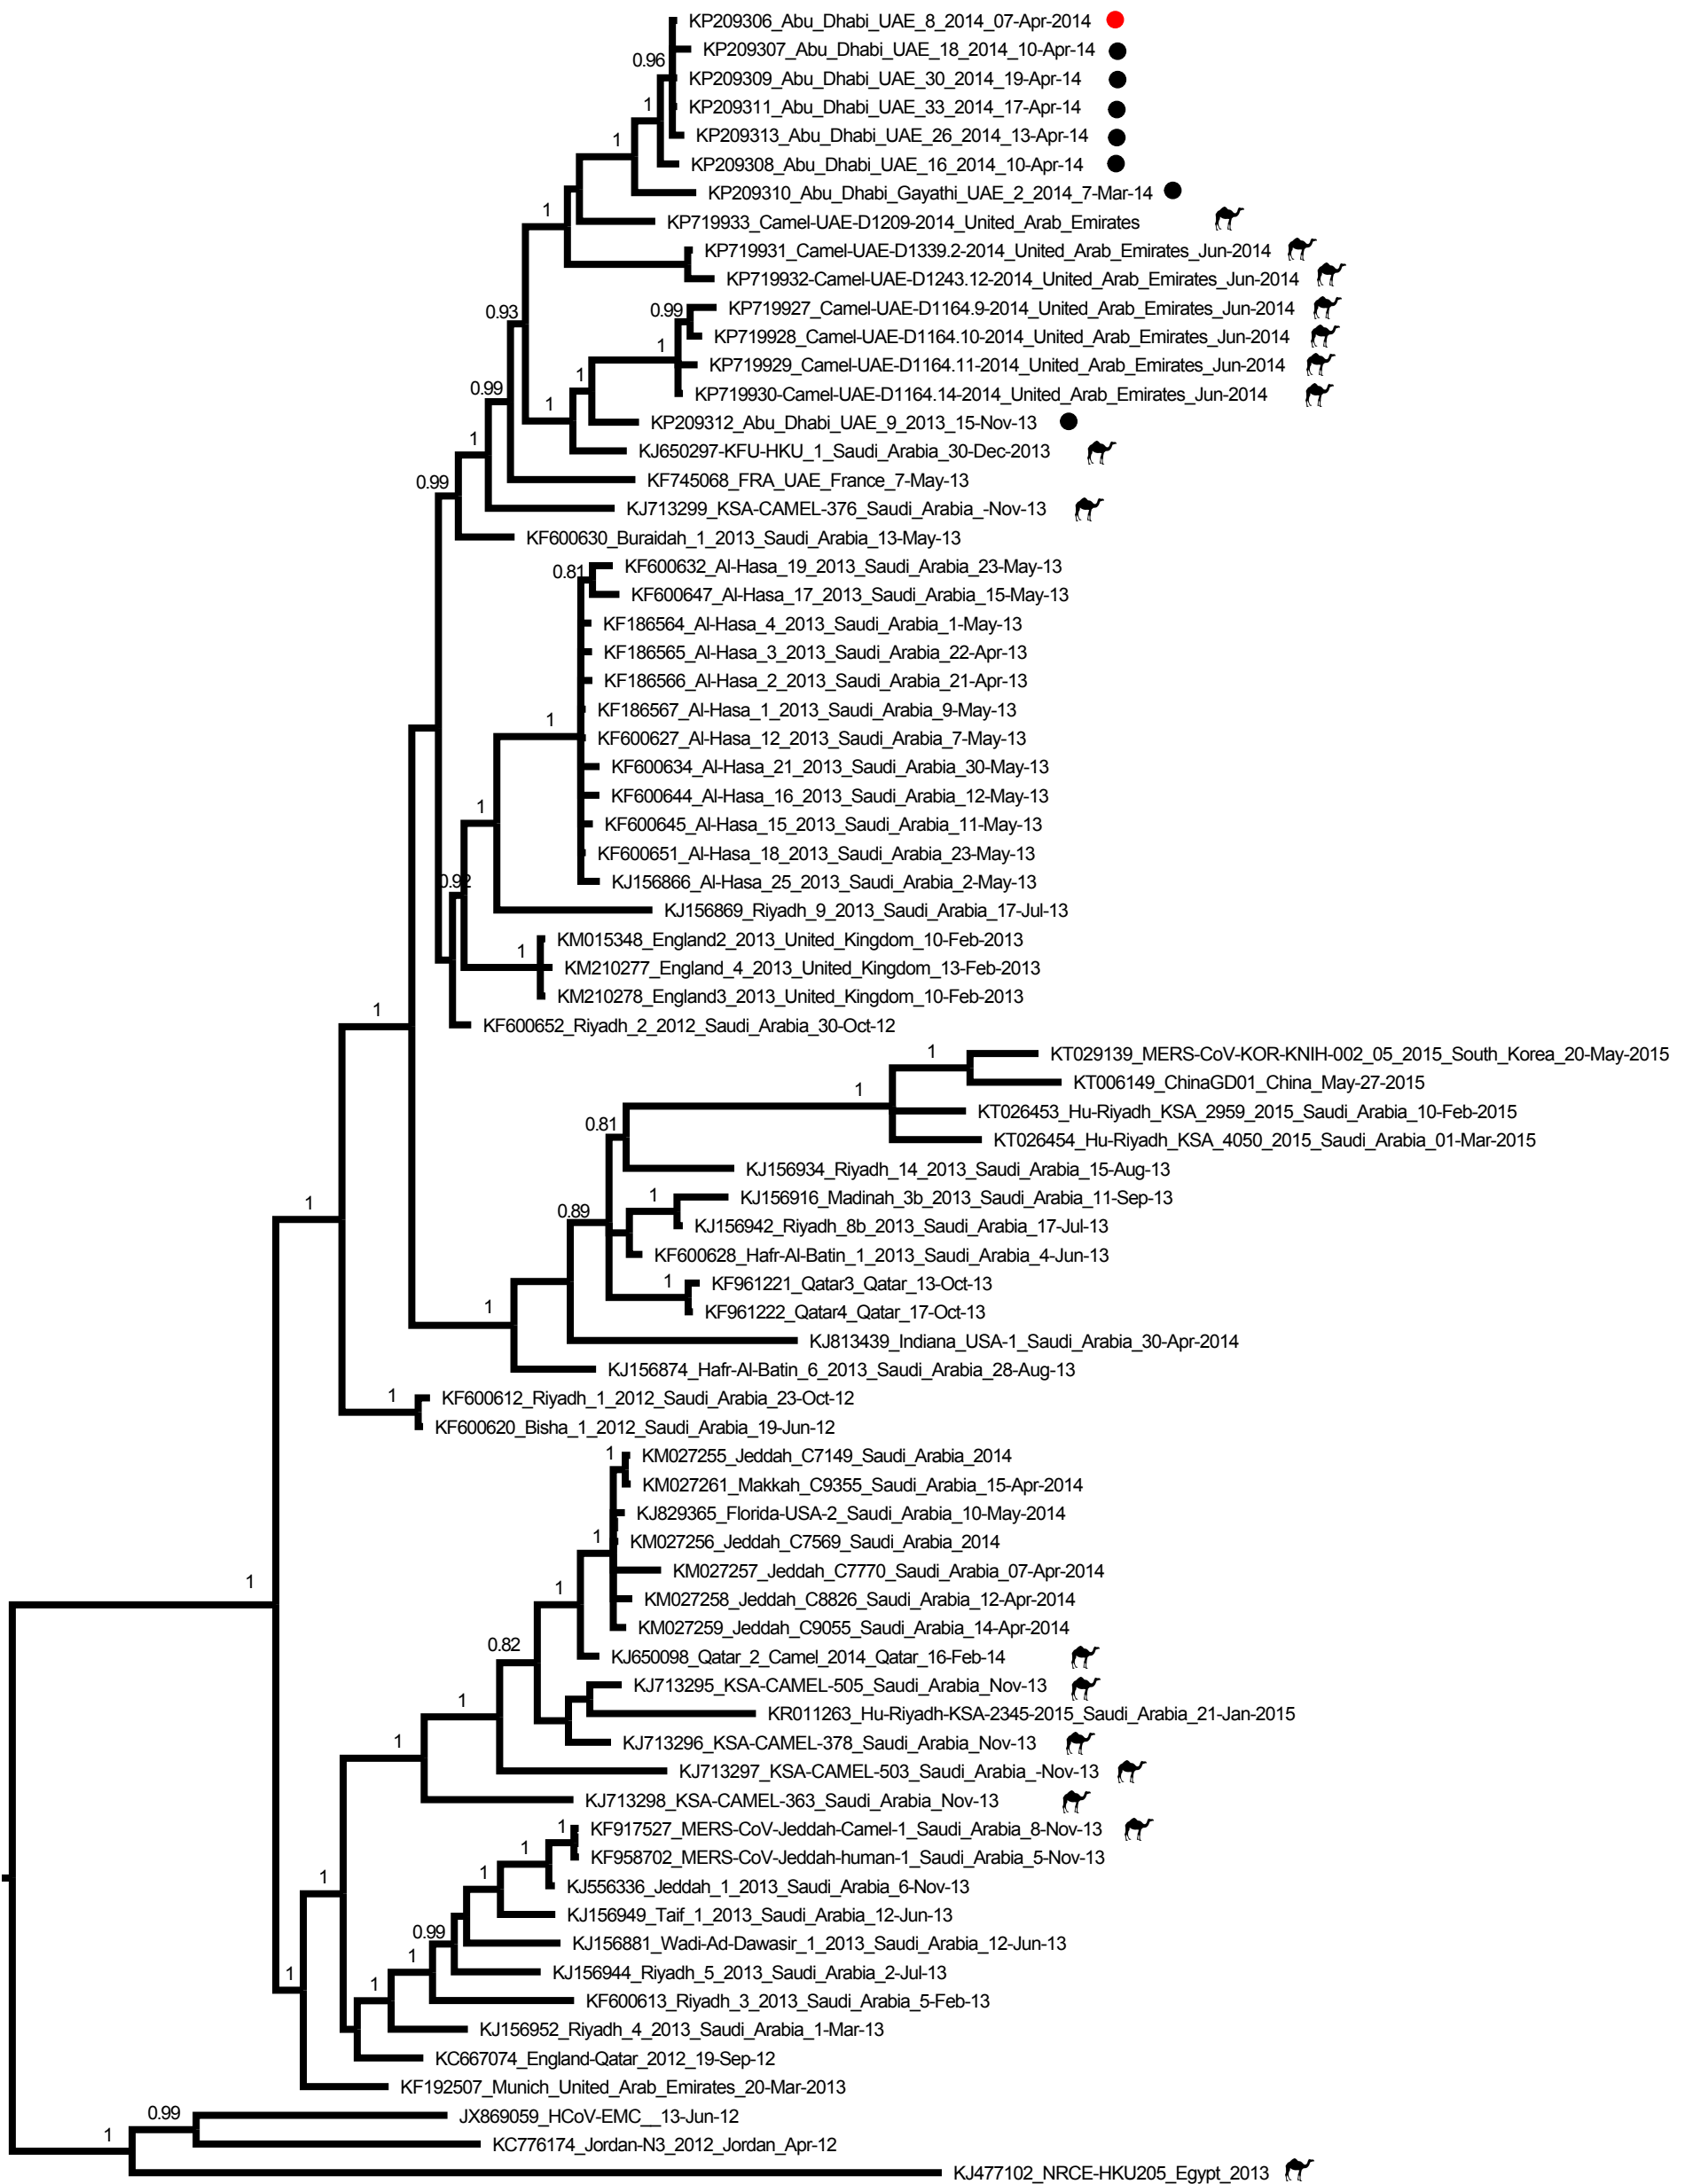

60E-4

Supplement: mmc1.pdf [file mmc1.pdf]
